# Supplementary material for: DBF4, not DRF1, is the crucial regulator of CDC7 kinase at replication forks
Source: PubMed Central journal article supplement (PMC11169917; doi:10.1083/jcb.202402144), 2024-06-12

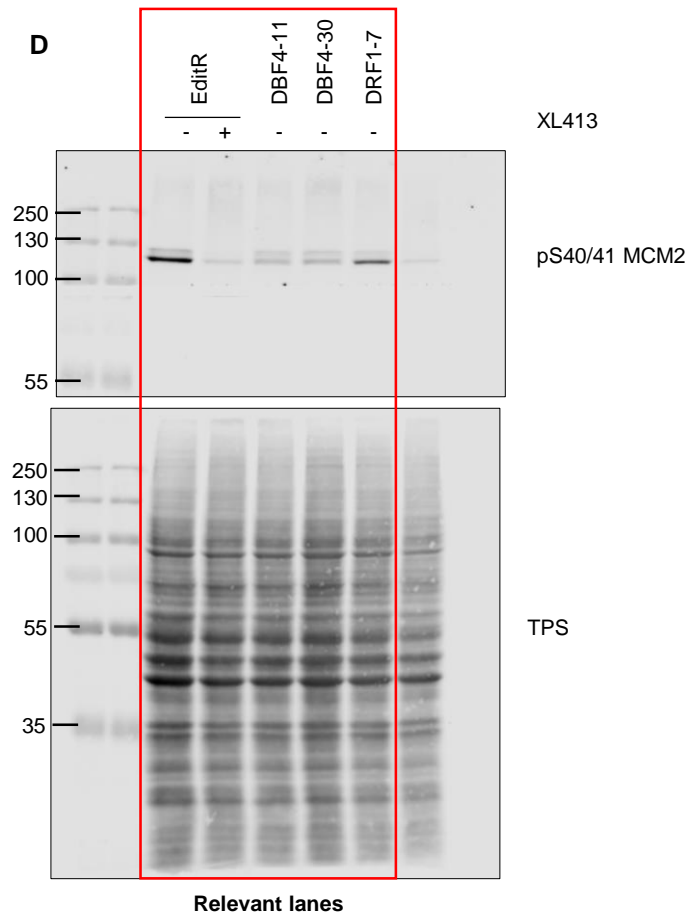

Relevant lanes

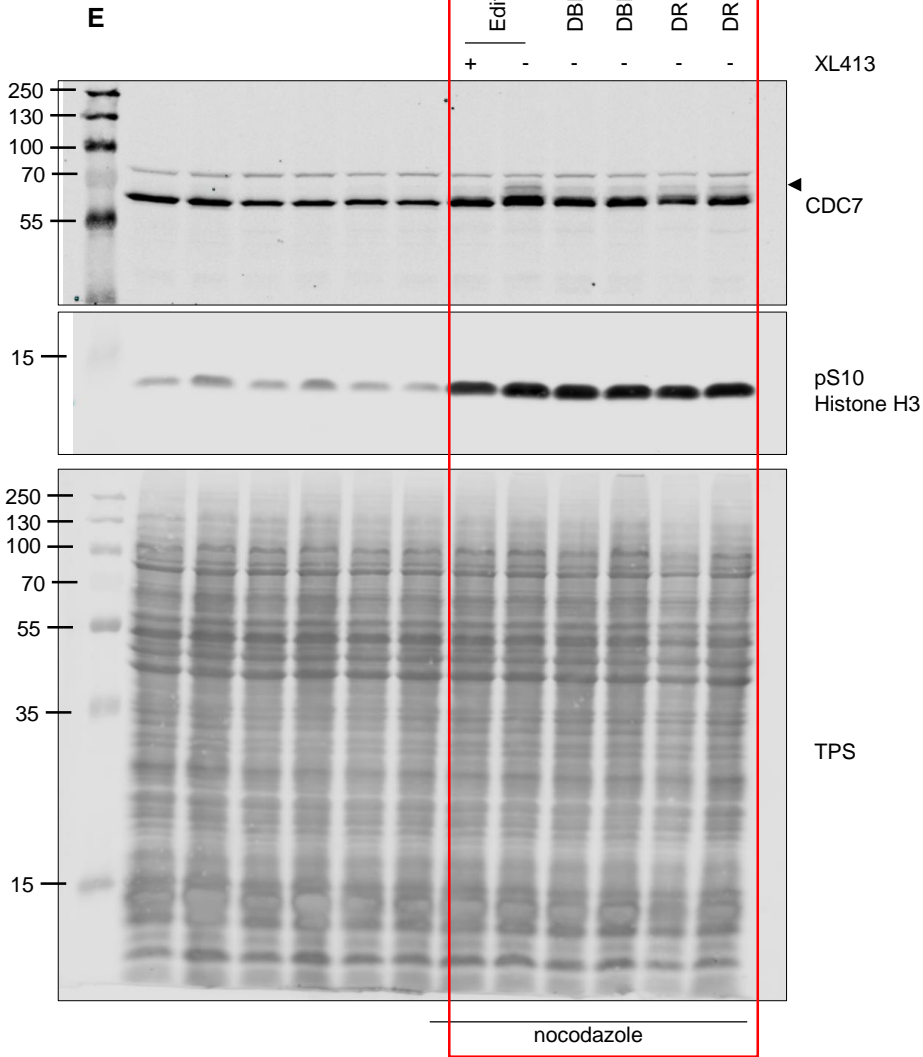

Supplement: jcb_202402144_sourcedataf1.pdf [file jcb_202402144_sourcedataf1.pdf]
