# Supplementary material for: DBF4, not DRF1, is the crucial regulator of CDC7 kinase at replication forks
Source: PubMed Central journal article supplement (PMC11169917; doi:10.1083/jcb.202402144), 2024-06-12

B

Gel1

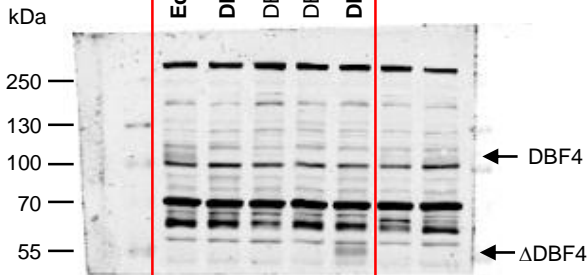

Gel2

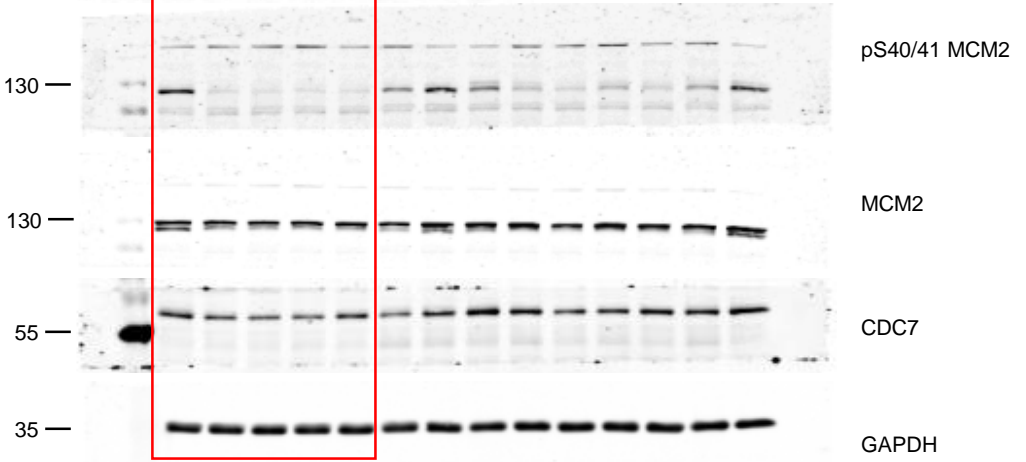

Relevant lanes

F

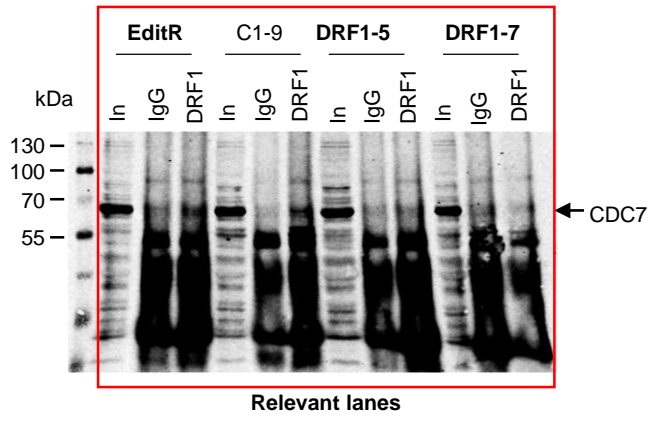

G

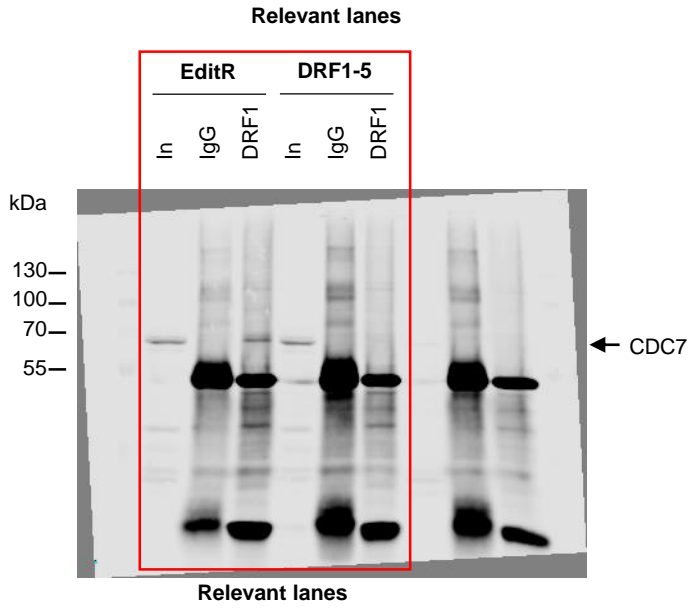

Supplement: jcb_202402144_sourcedatafs1.pdf [file jcb_202402144_sourcedatafs1.pdf]
